# Supplementary material for: C. elegans synMuv B proteins regulate spatial and temporal chromatin compaction during development
Source: Oxford University Press journal article supplement (doi:10.1242/dev.174383), 2019-09-12
Supplement: dev174383supp.pdf [file dev174383supp.pdf]

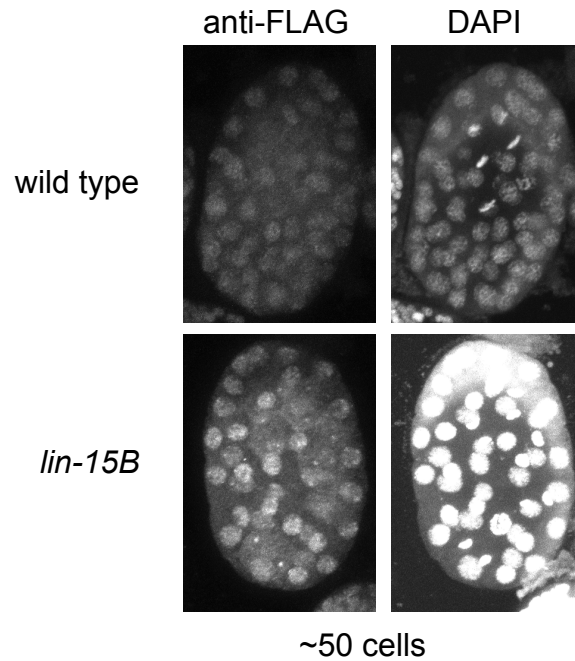

**Figure S1: MET-2::FLAG accumulates in nuclei in *lin-15B* mutants by the ~50 cell stage similar to wild type**

Wild type and *lin-15B* embryos expressing MET-2::FLAG at ~50 cell stage shown stained with anti-FLAG antibody and DAPI.

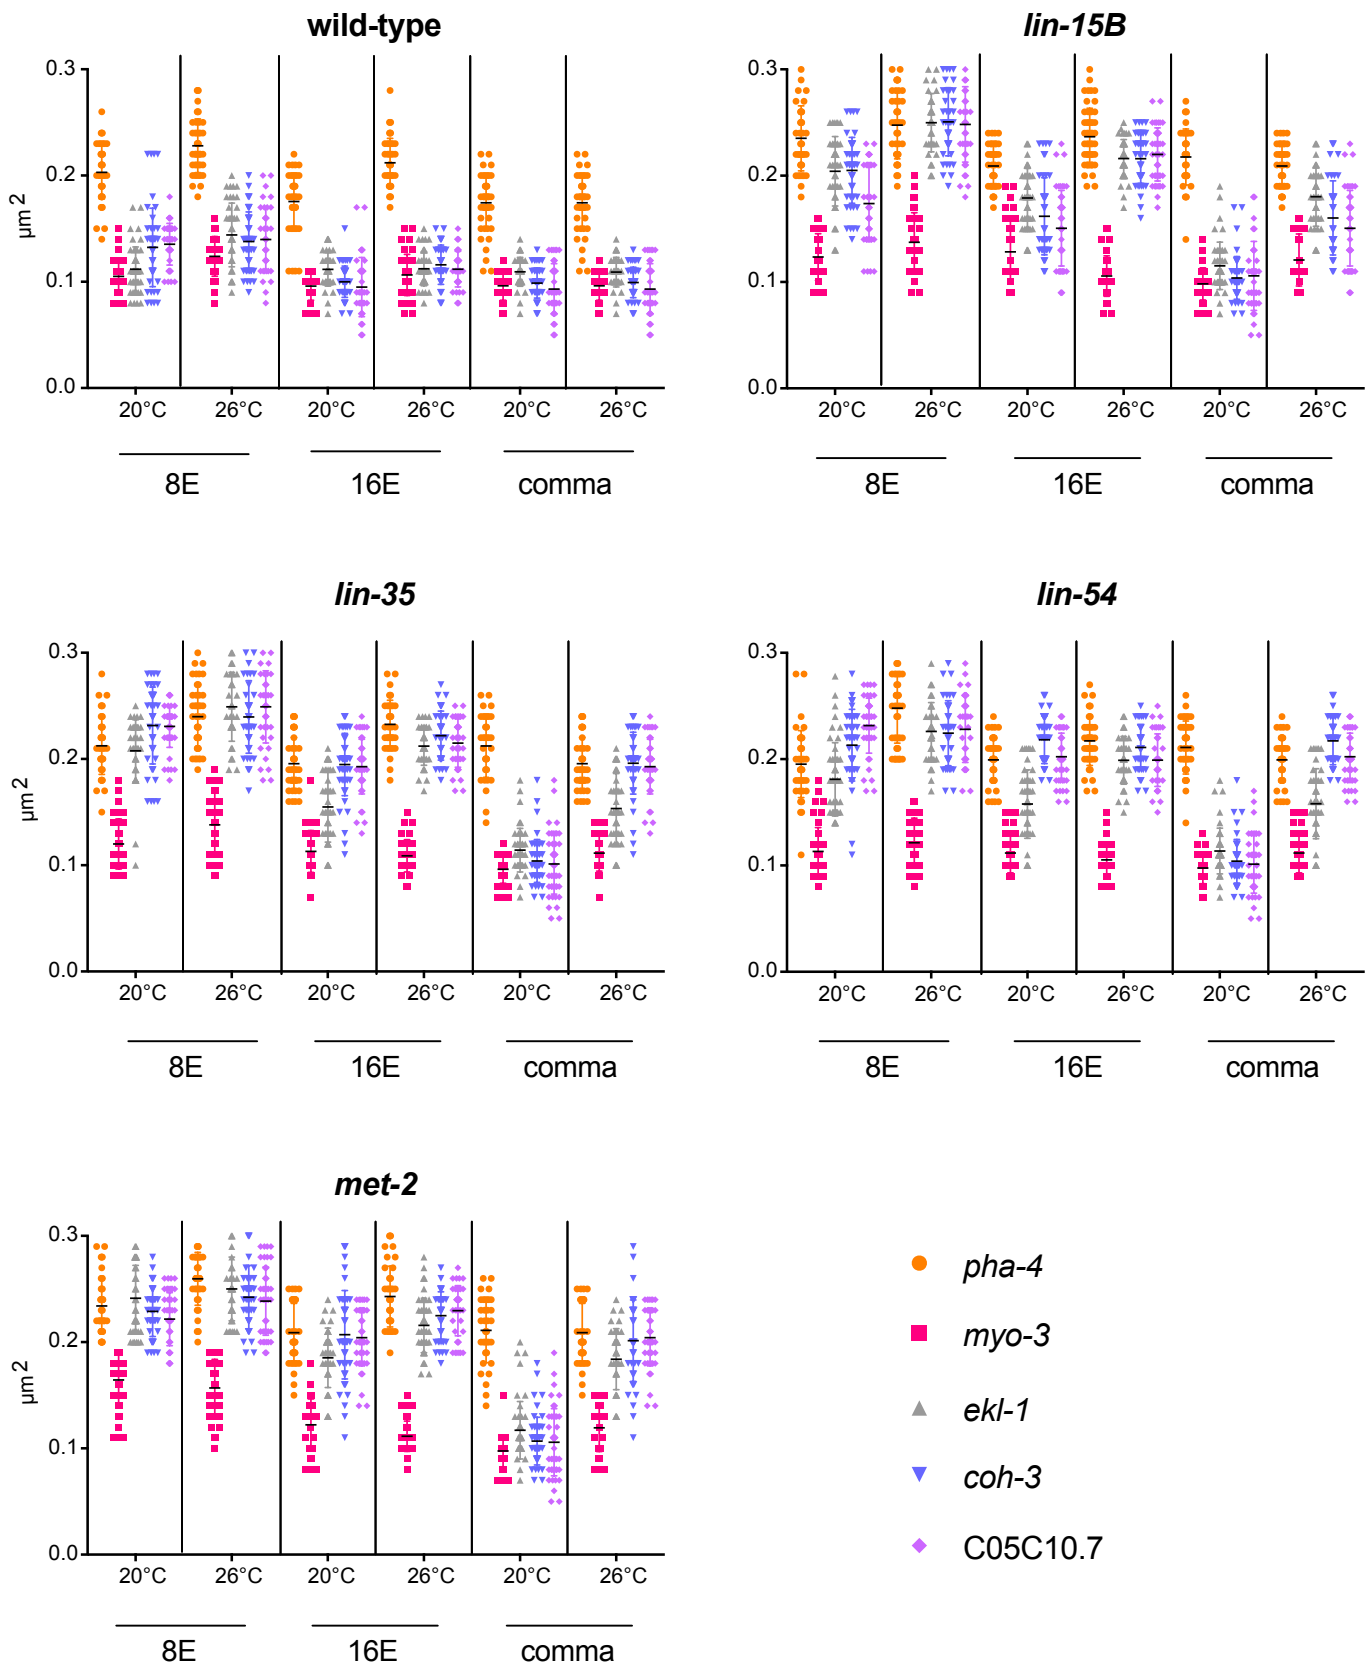

**Figure S2 Related to Figure 4: Fluorescent in-situ hybridization of synMuv B regulated loci reveals more open chromatin in synMuv B mutants at higher temperatures**

Wild-type (A), *lin-15B* (B), *lin-35* (D), *lin-54* (D), and *met-2* (E) embryos at 20°C and 26°C at 8E, 16E and comma stage were labeled with 568-5-dUTP (red) and Alexa Fluor 488 (green) probes 50kb upstream and 50kb downstream of *myo-3*, *pha-4*, *ekl-1*, *coh-3* and C05C10.7. Each dot represents the 3-D-distances between centroids ( $\mu\text{m}^2$ ) of one intestinal cell.

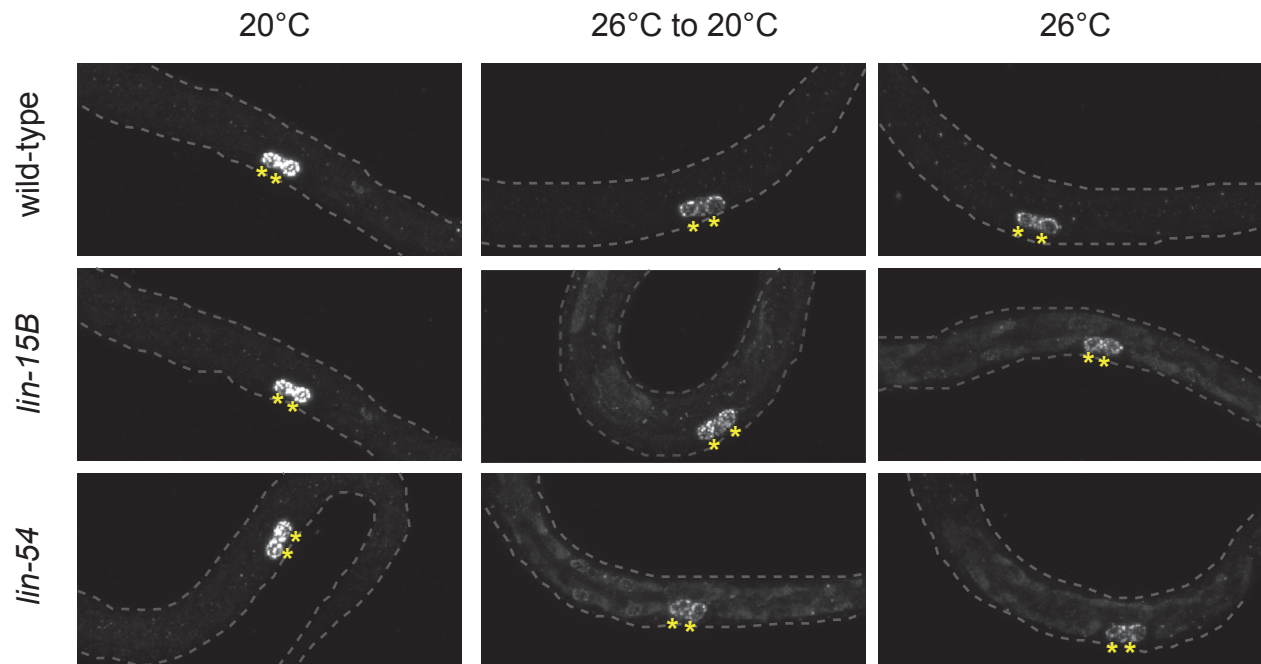

**Figure S3 Related to Figure 5: *synMuv B* mutant embryos downshifted to low temperature at 16E ectopically express PGL-1**

Wild-type, *lin-15B* mutant, and *lin-54* mutant embryos carrying a PGL-1:GFP transgene were placed at 26°C or 20°C in 1XM9 drops. Embryos were either kept at 26°C, downshifted to 20°C at 16E, or maintained at 20°C, and allowed to arrest at the L1 stage. L1 worms were fixed and imaged in Z-stack using confocal microscopy. Panels represent maximum projection of PGL-1:GFP. Asterisks mark primordial germ cells.

**Table S1: Mean time to each intestinal developmental stage (min)**

|                        | <b>wild-type</b> |             | <b><i>lin-15B</i></b> |             | <b><i>lin-54</i></b> |             |
|------------------------|------------------|-------------|-----------------------|-------------|----------------------|-------------|
|                        | <b>20°C</b>      | <b>26°C</b> | <b>20°C</b>           | <b>26°C</b> | <b>20°C</b>          | <b>26°C</b> |
| <b>2 cell - 8E</b>     | 236              | 185         | 271                   | 215         | 246                  | 197         |
| <b>8E - 16E</b>        | 349              | 297         | 373                   | 342         | 372                  | 334         |
| <b>16E - comma</b>     | 479              | 418         | 495                   | 440         | 491                  | 434         |
| <b>comma - pretzel</b> | 590              | 531         | 619                   | 564         | 619                  | 555         |
| <b>pretzel - L1</b>    | 691              | 644         | 725                   | 672         | 720                  | 661         |

**Table S2: Difference in mean time to same genotype at 20°C to each intestinal developmental stage (min)**

|                        | wild-type |      | <i>lin-15B</i> |      | <i>lin-54</i> |      |
|------------------------|-----------|------|----------------|------|---------------|------|
|                        | 20°C      | 26°C | 20°C           | 26°C | 20°C          | 26°C |
| <b>2 cell - 8E</b>     | 0         | -51  | 0              | -56  | 0             | -49  |
| <b>8E - 16E</b>        | 0         | -52  | 0              | -31  | 0             | -38  |
| <b>16E - comma</b>     | 0         | -61  | 0              | -55  | 0             | -57  |
| <b>comma - pretzel</b> | 0         | -59  | 0              | -55  | 0             | -64  |
| <b>pretzel - L1</b>    | 0         | -47  | 0              | -53  | 0             | -59  |

**Table S3: Difference in mean time from wild type at same temperature to each intestinal developmental stage (min)**

|                        | wild-type |      | <i>lin-15B</i> |      | <i>lin-54</i> |      |
|------------------------|-----------|------|----------------|------|---------------|------|
|                        | 20°C      | 26°C | 20°C           | 26°C | 20°C          | 26°C |
| <b>2 cell - 8E</b>     | 0         | 0    | 35             | 30   | 10            | 12   |
| <b>8E - 16E</b>        | 0         | 0    | 24             | 45   | 23            | 37   |
| <b>16E - comma</b>     | 0         | 0    | 16             | 22   | 12            | 16   |
| <b>comma - pretzel</b> | 0         | 0    | 29             | 33   | 29            | 24   |
| <b>pretzel - L1</b>    | 0         | 0    | 34             | 28   | 29            | 17   |

**Table S4: Strains used in this study**

| <b>Strain Name</b> | <b>Genotype</b>                                                                                                                                              | <b>Source</b> |
|--------------------|--------------------------------------------------------------------------------------------------------------------------------------------------------------|---------------|
| DUP0075            | <i>pgl-1(sam33[pgl-1::gfp::3xFlag])</i>                                                                                                                      | Dustin Updike |
| EL634              | <i>3XFlag::met-2</i>                                                                                                                                         | Eleanor Maine |
| JM163              | <i>cals79(elt-2p::dTomato, pRF4 (rol-6+))</i>                                                                                                                | Jim McGhee    |
| LNP0024            | <i>lin-35(n745); bnEx80(68XlacO +myo-3::mCherry+ worm genomic DNA); gwls39[baf-1p::GFP::lacI::let-858 3'UTR; vit-5::GFP]</i>                                 | This Study    |
| LNP0026            | <i>lin-54(n2231); bnEx80(68XlacO +myo-3::mCherry+ worm genomic DNA); gwls39[baf-1p::GFP::lacI::let-858 3'UTR; vit-5::GFP]</i>                                | This Study    |
| LNP0027            | <i>met-2(n4256); bnEx80(68XlacO +myo-3::mCherry+ worm genomic DNA); gwls39[baf-1p::GFP::lacI::let-858 3'UTR; vit-5::GFP]</i>                                 | This Study    |
| LNP0038            | <i>cals79(elt-2p::dTomato;pRF4); pgl-1(sam33[pgl-1::gfp::3xFlag])</i>                                                                                        | This Study    |
| LNP0040            | <i>lin-15B(n744) bnEx80(68XlacO +myo-3::mCherry+ worm genomic DNA); gwls39[baf-1p::GFP::lacI::let-858 3'UTR; vit-5::GFP]; (cals79(elt-2p::dTomato;pRF4))</i> | This Study    |
| LNP0041            | <i>lin-15B(n744) cals79(elt-2p::dTomato;pRF4); pgl-1(sam33[pgl-1::gfp::3xFlag])</i>                                                                          | This Study    |
| LNP0049            | <i>lin-54(n2231) cals79(elt-2p::dTomato;pRF4); pgl-1(sam33[pgl-1::gfp::3xFlag])</i>                                                                          | This Study    |
| LNP0050            | <i>bnEx80(68xlacO+myo-3::mCherry+worm genomic DNA); gwls39[baf-1p::GFP::lacI::let-8583'UTR;vit-5::GFP];cals79(elt-2p::dTomato;pRF4))</i>                     | This Study    |

**Table S5: Primers used for DNA FISH**

|                             |        | <b>Forward</b>            | <b>Reverse</b>            |
|-----------------------------|--------|---------------------------|---------------------------|
| Upstream<br>of <i>pha-4</i> | Pair 1 | CGATGGAGCGCACTTGCACG      | CAATCCCGGTAAAATGACG       |
|                             | Pair 2 | GGCAAACCTGGTAAATTGTCGG    | GCACCAGGCGCACTTTTGGC      |
|                             | Pair 3 | GCTGCTGGTTTTGACTGTGG      | GGGTGAGTATCCAATTCCG       |
|                             | Pair 4 | CAACTCGTGATGACTTTAACC     | GGTTGCACAGCCCTACATG       |
|                             | Pair 5 | GACTGAGTGAGATTGTAAAC      | CTCGTATAAAGTTATTTCCCAGG   |
| Dnstream<br>of <i>pha-4</i> | Pair 1 | CCAGCCACTGTGACATCGAC      | CTTCAATGGTTAAACAAAGTTATG  |
|                             | Pair 2 | CTGATGCTAACCAAGAGAGTG     | CATCGTCTAACTTTGAGCATAG    |
|                             | Pair 3 | CCTAACCGGTCAAATTTGTG      | GCTAGAAGAATCAAGGCTTTTCC   |
|                             | Pair 4 | GTAATTGGTGGAAAAAGAAAATTTG | GCGGTCATTTTTTTCATATGCATCG |
|                             | Pair 5 | CTCCTAACTTTCTCACAGAC      | GTCTCGTTCAGCCACAAAAATTGC  |
| Upstream<br>of <i>myo-3</i> | Pair 1 | CACCACCAACTCCCCCTTCT      | GGTATATTTTTCAATTGTGCC     |
|                             | Pair 2 | GCTTCATGGTAGATGGATTTG     | CATTGCTCTCATTCCCACATGCTG  |
|                             | Pair 3 | GGATATAATTTCTTTGCAGGATC   | GGCAATGAAACAACAACCTTTTG   |
|                             | Pair 4 | CCAAGGTACGAGACATTTAC      | GATGATATCAAGATTTTGAGAG    |
|                             | Pair 5 | GGCATGTATTTTCAGAAATATAC   | GGATGTTATCAAAGTTGAAG      |
| Dnstream<br>of <i>pha-4</i> | Pair 1 | CCGCACACAAGTCTCAAATG      | GGTGTACAGAAATTCTATATTGG   |
|                             | Pair 2 | CGTTGATTTTACGAATCTTCCC    | GCAATCAAGTCTAAACAATTTTTTC |
|                             | Pair 3 | CATAGAATTTGCTTACGTTTC     | GATGAATTCACCCATTTCC       |
|                             | Pair 4 | GGACTTCTTCGATTGAG         | GGCACAGTTTTTAAGTGTTCCTCG  |
|                             | Pair 5 | GTGGACATACATCAGCGTCAG     | GTCTTGTTTCGGATCCTCATAAG   |
| Upstream<br>of <i>ekl-1</i> | Pair 1 | GGGAGGGATTCTCAAATCTTTC    | GCAAGCTTTATTGGCAGATTTCAG  |
|                             | Pair 2 | GGTTCTTAATTTTCTCTGAAAAAGC | CGCGTGTCTGTCGTTGGAGTTG    |
|                             | Pair 3 | CATGGCCTCCCTATTAGAAG      | CCAAAATTGGGGGTTCCCTCGAG   |
|                             | Pair 4 | CAAGTTTCAACAACACCGAATCC   | GCTCTTTCAAATGTTGTTCAAGC   |
|                             | Pair 5 | GGATCATCTGCTGCTCCAATCC    | CCACTGGAGGTACAATTTTTACGC  |
| Dnstream<br>of <i>ekl-1</i> | Pair 1 | CGAGTACCCCAAAGCCGGC       | GCCACATTACCAATAGTTTAGG    |
|                             | Pair 2 | GACGTGCCCAACATTGCC        | CTGATAAAGTTTTCGCTCGG      |
|                             | Pair 3 | GCCACATGAGACACACACG       | CTCCCAACAATGGTGCGCCTC     |
|                             | Pair 4 | CCGGGTACATCTCTGTTTTT      | GAGTTGAGCACACACATGG       |
|                             | Pair 5 | GCTGACATTGAACCGGATGAC     | CGTCGCCTATCTTGCAATGG      |
| Upstream<br>of <i>coh-3</i> | Pair 1 | GGTCATGTTGGACTAAATATAG    | CCCGTTTTTCAAATTTATTTT     |
|                             | Pair 2 | GCAGAGATAAAGTGCTTATCATC   | GGAGGTCAGCAATTAATATTTG    |
|                             | Pair 3 | GCAGACCTTTTCTTTTTCAC      | CCAGGCACGTATAGACCAAGAACC  |
|                             | Pair 4 | GGGTGGCTGGTGACTTTGGAATGG  | CCGACTCACTTCATTCCAAAC     |
|                             | Pair 5 | GCTCGGATTGCACGGATTGGCC    | CTCACTTTCAGAATTAGAAC      |
| Dnstream<br>of <i>coh-3</i> | Pair 1 | CCTCTTCTCTCTGTTCC         | CACAACCTGAGCTTCTGTTTTATG  |
|                             | Pair 2 | GCGTCCCCTCCGTAAAGG        | CTCGAATAAAAATGAAAACCTTG   |
|                             | Pair 3 | CTGGAATCTGTGAAATGAATG     | GTTGTACATAGTATGCCCTCG     |
|                             | Pair 4 | GTGGAGCAACCTATCCCC        | GAAAAATAGCTGACATTTTG      |
|                             | Pair 5 | GTCTTTATCCCGCCATTCTTCC    | CTAATTGTTGGTTGTGAGG       |



|                         |        |                            |                          |
|-------------------------|--------|----------------------------|--------------------------|
| Upstream<br>of C05C10.7 | Pair 1 | CTAGCAGTATAAGTGTCAC        | GACTTGAAGCTTGAAACGC      |
|                         | Pair 2 | GACTAAATTTATAACAACCTTTATAG | GAGTAGCATCTCAGAACTG      |
|                         | Pair 3 | GGTATTCGGAAAACGGGTGAAACC   | GTACTTGCAGTTTGCAGAAAG    |
|                         | Pair 4 | GACAAATGGCATCAAATATAG      | GAAATCACAACAATTGAAATTCTG |
|                         | Pair 5 | CCGATTAAGACCCGGACTTTAATTAC | CGACGAAAAGGAGAGACTCACTGG |
| Dnstream<br>of C05C10.7 | Pair 1 | CCACAGAAAGTCCAATCTCG       | CCTCGCGATTGTTGGGGAATC    |
|                         | Pair 2 | CGAGCCACTCAGCAAGGAAG       | CAGCAACGTTGGCGAGTTCCTC   |
|                         | Pair 3 | CGTCTCATTGGAAAGGAGG        | CGAGCCACTCAGCAAGGAAG     |
|                         | Pair 4 | GTAGGTATTGTTTGATTCGG       | CGTGATGATCTTTTGGGATATCG  |
|                         | Pair 5 | GAGGTGGATGGAAAAAGAAG       | GGAGCAAAAAAGATAGAGGAAG   |
